# Supplementary material for: Novel Long Noncoding RNA, Macrophage Inflammation-Suppressing Transcript (MIST), Regulates Macrophage Activation During Obesity
Source: PubMed Central journal article supplement — Arterioscler Thromb Vasc Biol. 2020 Feb 13;40(4):914–28. doi: 10.1161/ATVBAHA.119.313359 (PMC7098442; doi:10.1161/atvbaha.119.313359), 2020-02-13
Supplement: atv-40-914-s001.pdf [file atv-40-914-s001.pdf]

# SUPPLEMENTAL MATERIALS

## **A novel long non-coding RNA, MIST, regulates macrophage activation during obesity**

Kenneth Stapleton<sup>1, 2</sup>, Sadhan Das<sup>1</sup>, Marpadga A. Reddy<sup>1</sup>, Amy Leung<sup>1</sup>, Vishnu Amaram<sup>1, 2</sup>, Linda Lanting<sup>1</sup>, Zhuo Chen<sup>1</sup>, Lingxiao Zhang<sup>1</sup>, Rengasamy Palanivel<sup>3</sup>, Jeffrey A. DeIuliis<sup>3</sup>, and Rama Natarajan<sup>\*1, 2</sup>

<sup>1</sup>Department of Diabetes Complications and Metabolism, Diabetes and Metabolic Research Institute, <sup>2</sup>Irell and Manella Graduate School of Biological Sciences, Beckman Research Institute of City of Hope, Duarte, California; <sup>3</sup>Cardiovascular Research Institute of the Case Western Reserve University, Cleveland, Ohio

\* Corresponding author

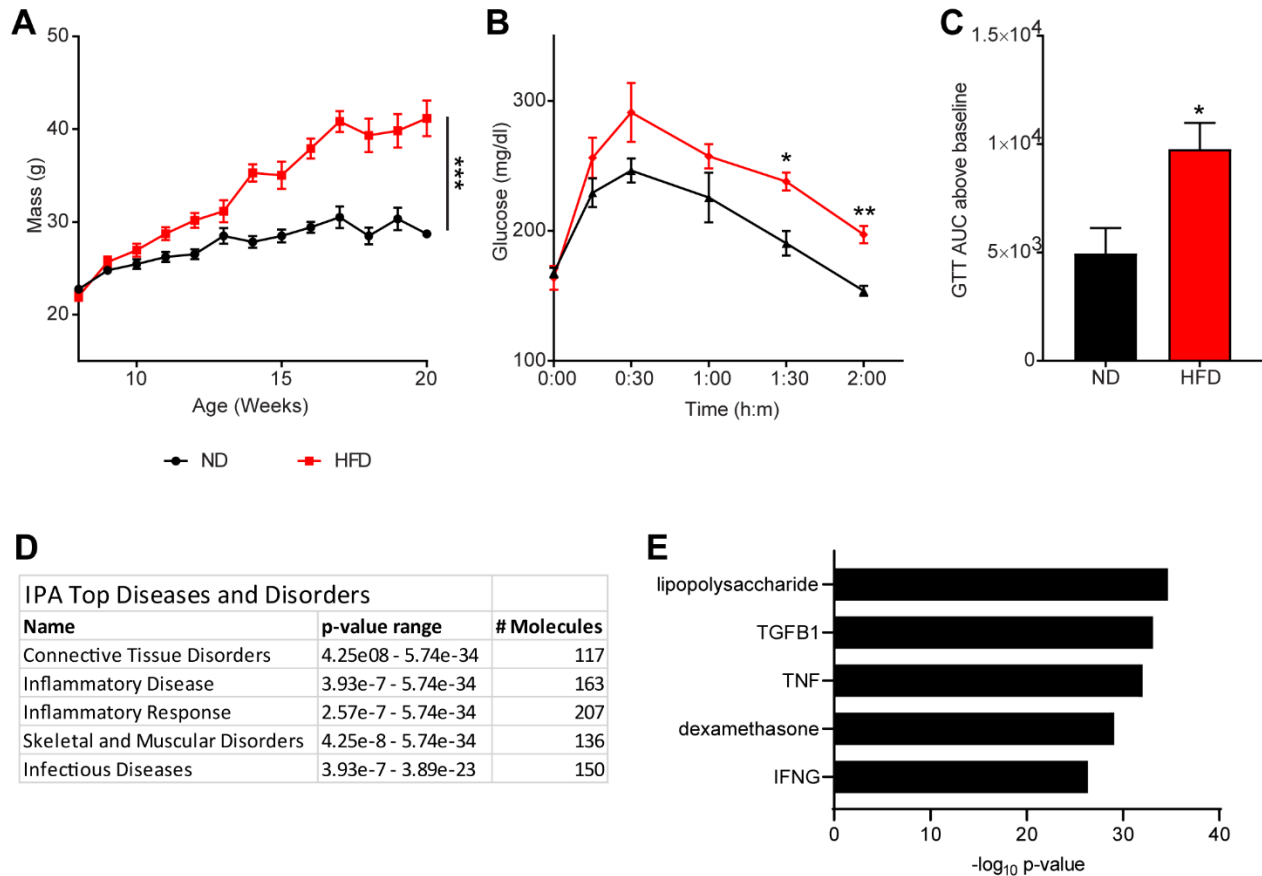

### Supplemental Figure I

Differential mRNA and lncRNA expression in peritoneal macrophages of high fat diet (HFD) vs normal diet (ND) mice. **(A)** Weight of mice during 12 weeks feeding of HFD or normal diet, beginning at 8 weeks of age.  $n = 12$  mice/group. **(B)** Glucose tolerance test (GTT) in mice after 12 weeks of feeding HFD or normal chow, beginning at 8 weeks of age. Tail vein blood samples were collected at indicated time intervals post injection.  $n = 12$ /group. **(C)** Area Under Curve (AUC) analysis of GTT results, normalized by average baseline fasting glucose for each group. **(D)** Ingenuity Pathway Analysis of differentially expressed genes (adjusted  $p$ -value  $< 0.1$ ) based on RNA-seq analysis of elicited peritoneal macrophages (PMs) from HFD-fed mice. **(E)** Top five predicted Upstream Regulators based on  $p$ -value, identified using Ingenuity Pathway Analysis. \* $p < 0.05$ , \*\* $p < 0.01$ , \*\*\* $p < 0.001$

**A**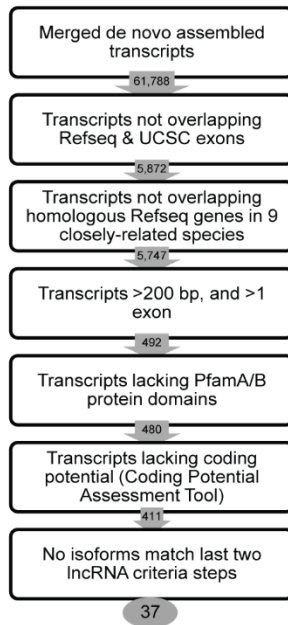**B**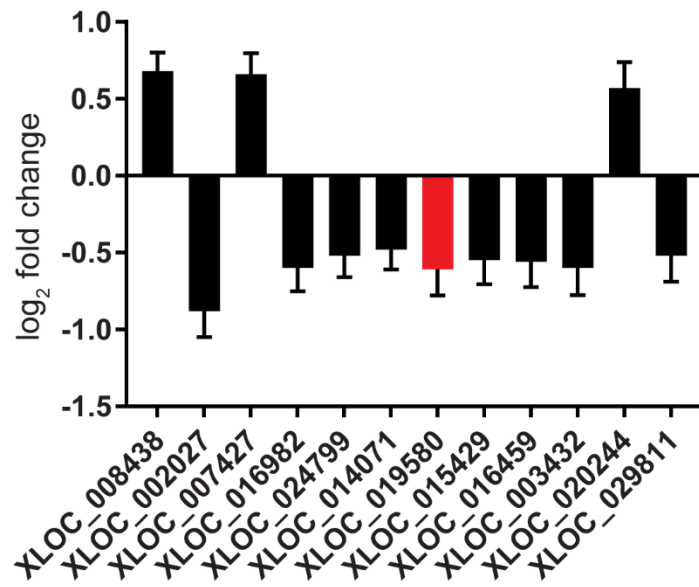

### Supplemental Figure II

**(A)** Computational pipeline for identification of lncRNAs from *de novo* RNA-seq assemblies. Numbers indicate total *de novo* transcripts that pass each filter. **(B)** Differential expression analysis of novel transcripts identified as lncRNAs from RNA-seq. Transcript XLOC\_019580 was renamed as *Mist* and its function was further characterized. Bars indicate mean  $\pm$  SEM fold change in HFD-fed mouse PMs vs. normal diet.

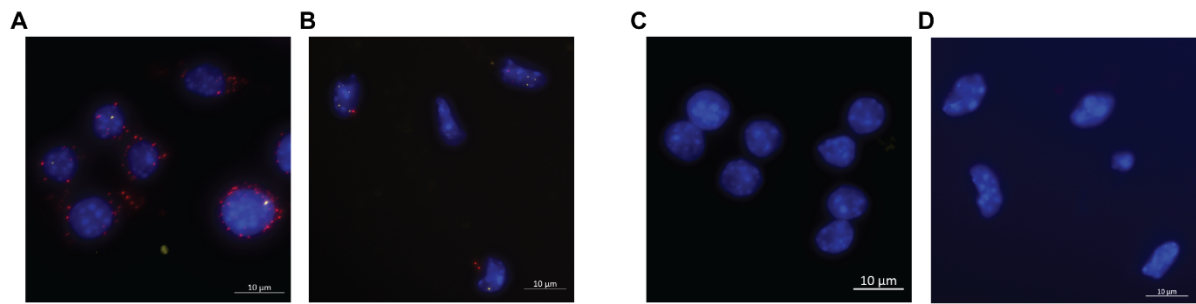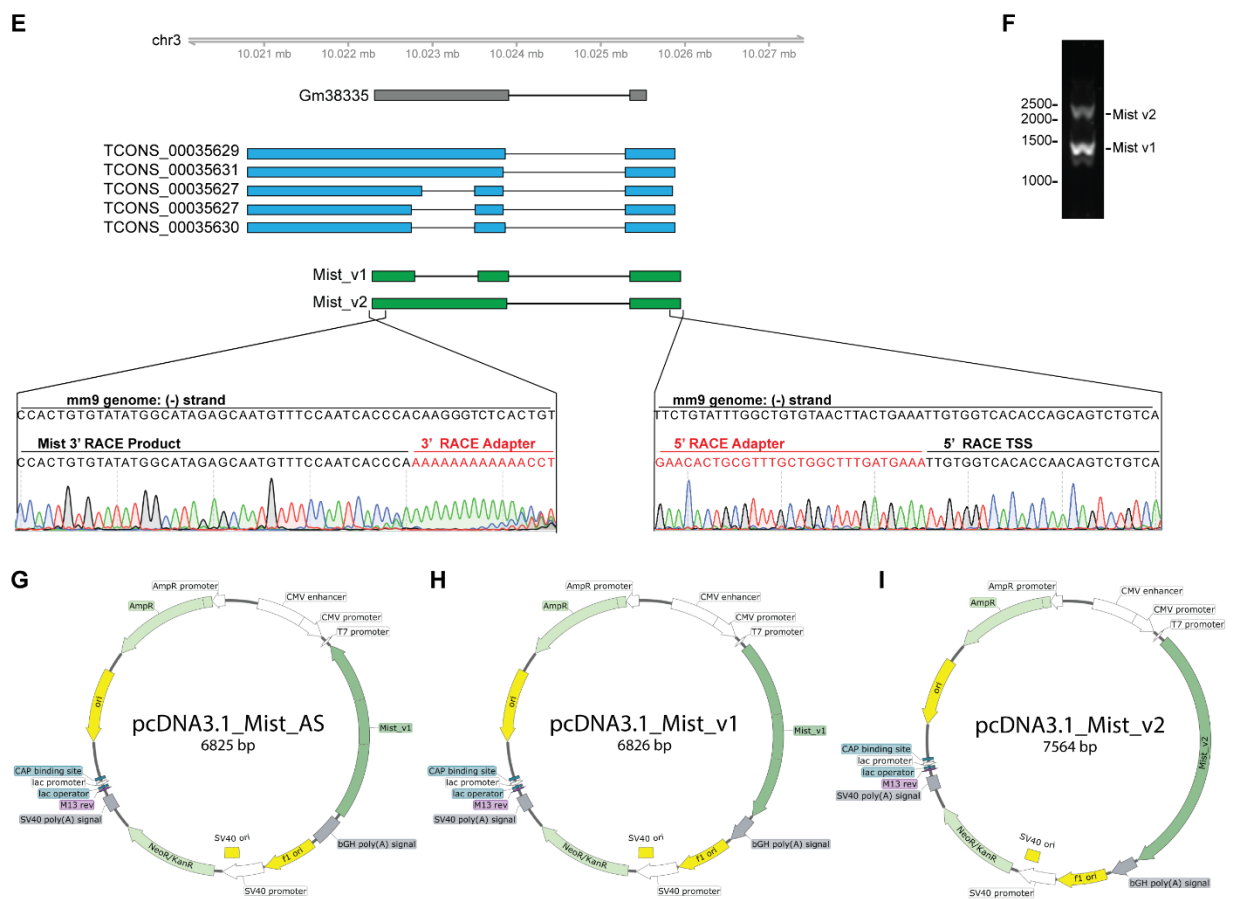

### Supplemental Figure III

*Mist* characterization and cloning. (A-B) Control images of RNA-FISH in mouse RAW cells (A) and primary PMs (B); related to Figures 1H-I. Probes for *Mist* (yellow) and *Ppia* (red); nuclei are counterstained with DAPI (blue). Scale bars represent 10 μm. (C-D) Control images for RNA-FISH showing RAW cells (C) and primary mouse PMs (D) treated with no probe but processed through signal amplification steps. Nuclei are counterstained with DAPI (blue). Scale bar represents 10 μm. (E) Depiction of overlapping transcript predictions at *Mist* locus, including

Genbank mRNA annotation (gray), *in silico* transcript isoform predictions based on RNA-seq data, assembled using Tophat2 software (blue), and *Mist* complete transcripts (green) based on 5' and 3' RACE clones. Sanger sequencing chromatograms of RACE-PCR clones are shown below, aligned to the minus strand of chromosome 3. (F) *Mist* variants, generated using primers targeting 5' and 3' ends of *Mist* and template cDNA from RAW 264.7 cells. (G-I) Plasmid maps of *Mist* splice variants (*Mist\_v1* and *Mist\_v2*) and antisense (*Mist\_AS*) sequence cloned into pcDNA3.1 overexpression vector. To generate AS plasmid, full-length *Mist\_v1* fragment was cloned into pcDNA3.1(-) vector.

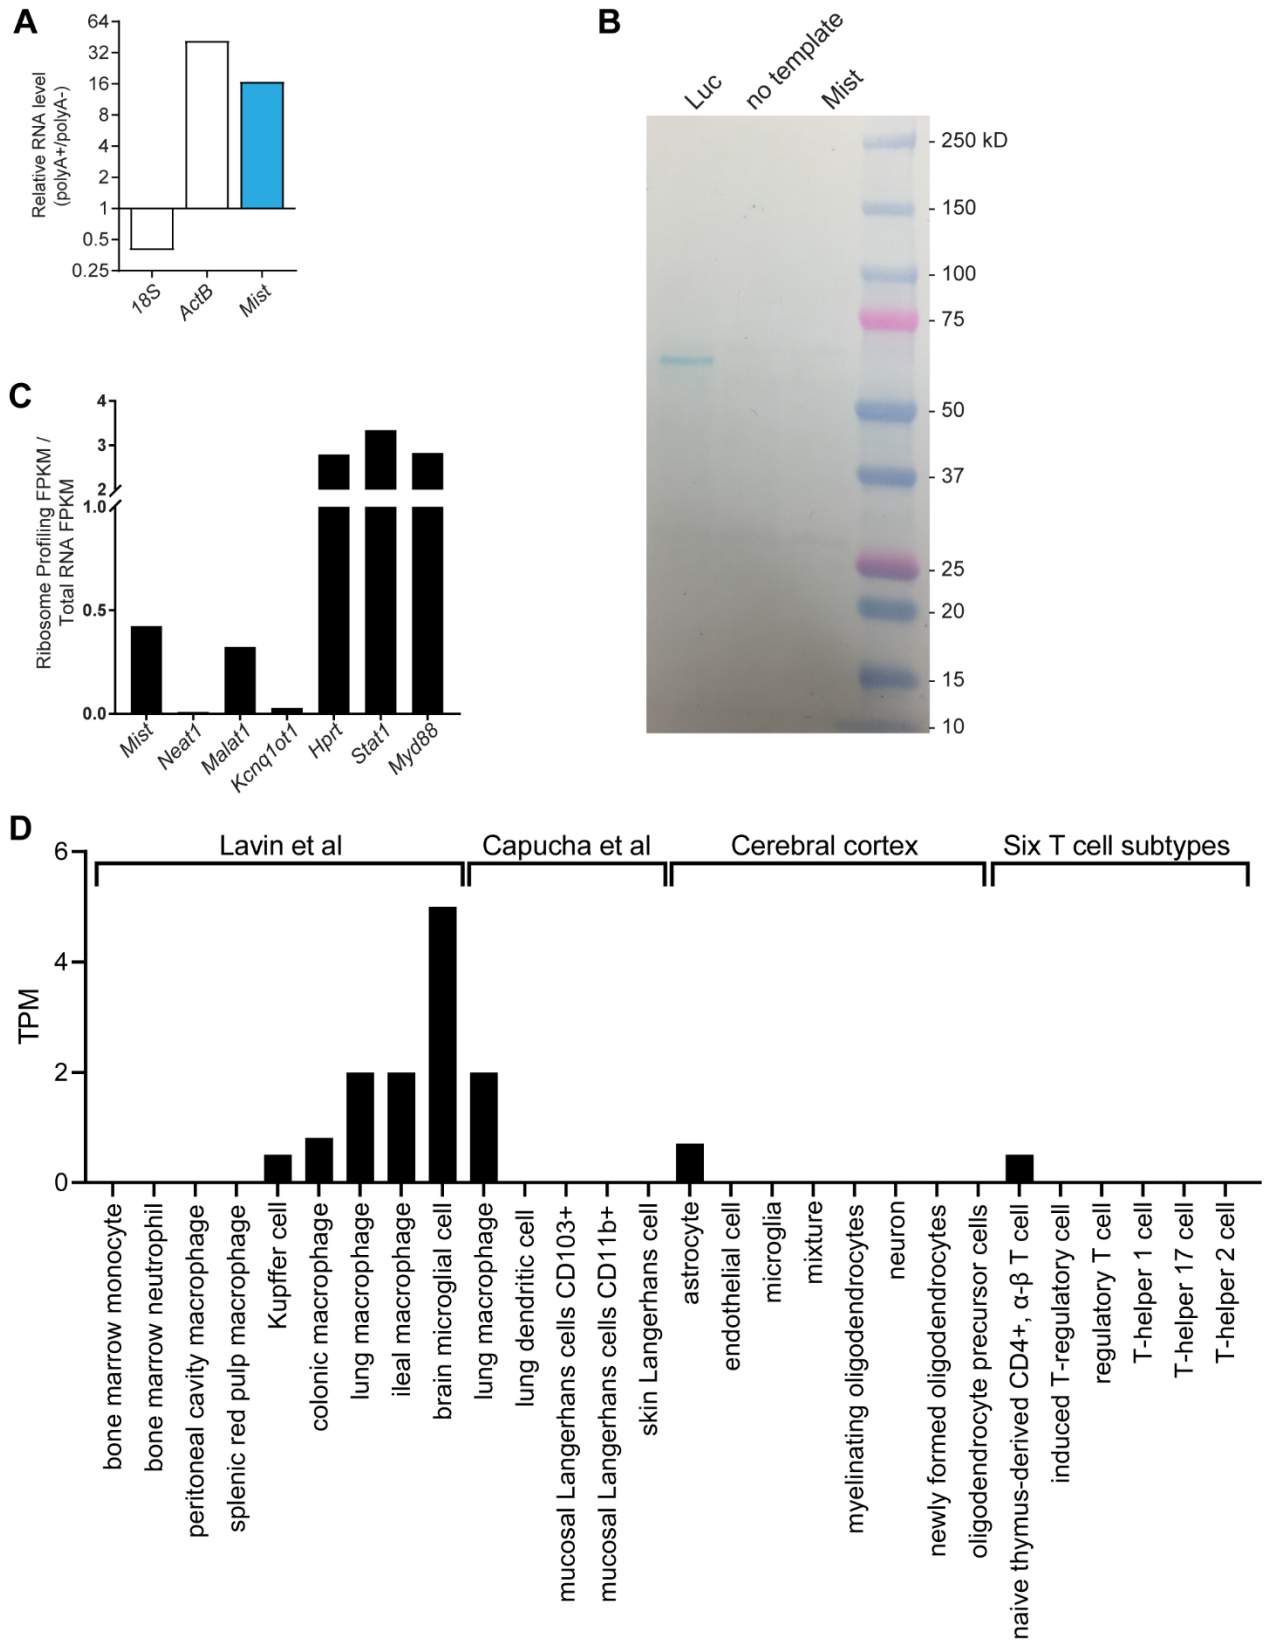

Supplemental Figure IV

Characterization of the *Mist* transcript. **(A)** Ratio of transcript abundance in poly(A)-enriched versus poly(A)-depleted fractions of RNA from mouse PMs. **(B)** In vitro translation assay. Assay was performed using T7 TNT Quick Coupled Transcription/Translation System (Promega) and Transcend Colorimetric Non-radioactive Translation Detection System (Promega) according to manufacturer instructions, using *Mist\_v1* pcDNA3.1(+) construct, as well as T7 Luciferase control DNA as positive control. **(C)** Ribosomal profiling of *Mist* and other lncRNAs and mRNAs. Bars represent ratios of fragments per transcript kilobase per million reads (FPKM) from global ribosomal profiling vs. total RNA-seq in mouse PMs. Raw data from Wang et al<sup>1</sup> was aligned to mm9 genome assembly using HISAT2 and gene FPKM values were generated using Cufflinks. **(D)** Transcript per million read (TPM) values from baseline cell type RNA-seq experiments in the EMBL-EBI Expression Atlas database. Among the 36 RNA-seq sets FOR *Mus musculus* in the database, expression of Gm38335 was detected among 4 datasets (top labels) and mostly enriched in macrophages.

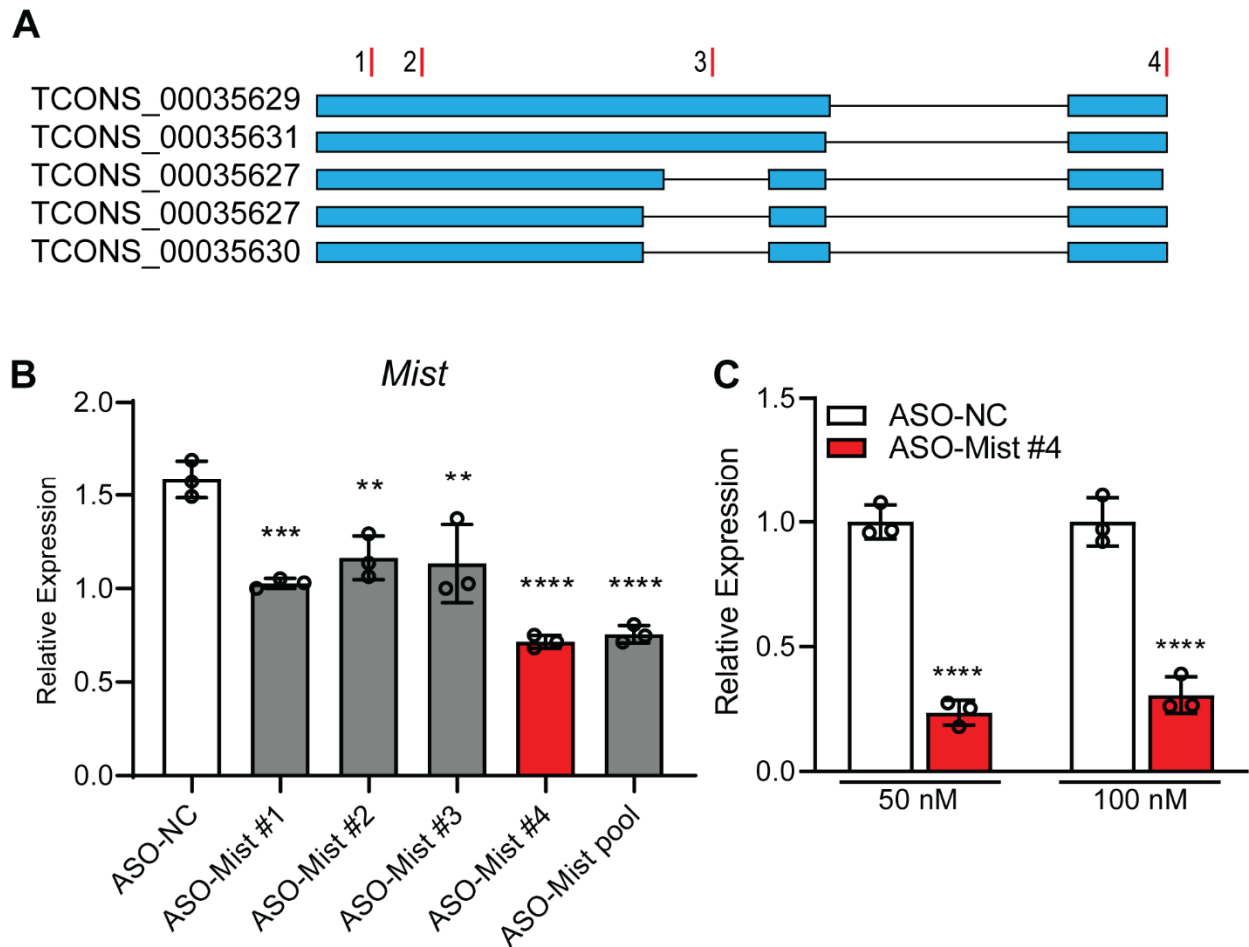

Supplemental Figure V

Design and efficacy of LNA-modified antisense oligonucleotides (GapmeRs) targeting *Mist*. (A) Four GapmeRs were designed to target various regions of *Mist in silico* predicted transcripts. (B) RT-qPCR analysis of *Mist* expression in RAW cells 48 h post-transfection of *Mist*-targeted GapmeRs (ASO-Mist) or non-targeting GapmeR (ASO-NC) at 100nM. Individual GapmeRs and pooled GapmeRs were tested for *Mist* silencing efficacy. ASO-Mist #4 was most effective, and was used for subsequent knockdown experiments. n = 3. (C) Optimization of transfection conditions showed greatest knockdown efficacy at 50nM GapmeR concentration. n = 3. Data are presented as mean  $\pm$  SD. \*\*p<0.01, \*\*\*p<0.001, \*\*\*\*p<0.0001, calculated using One-Way ANOVA followed by Dunnett multiple comparisons test (B) or student's t-test (C).



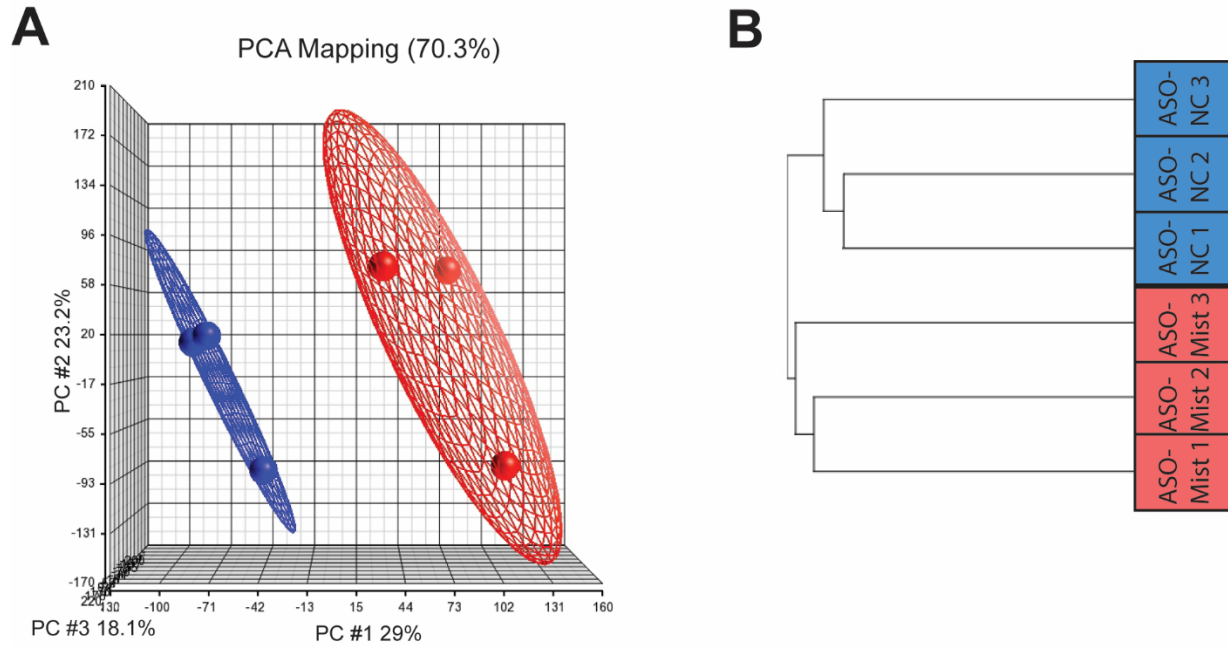

Supplemental Figure VI

Batch analysis of GapmeR-mediated knockdown followed by microarray analysis. (A) Principal component analysis of *Mist*-targeted GapmeR (red) and negative control GapmeR (blue). (B) Hierarchical clustering of samples. Both visualizations were generated using Partek software. Information on GapmeR design and selection can be found in Supplemental Figure 5.

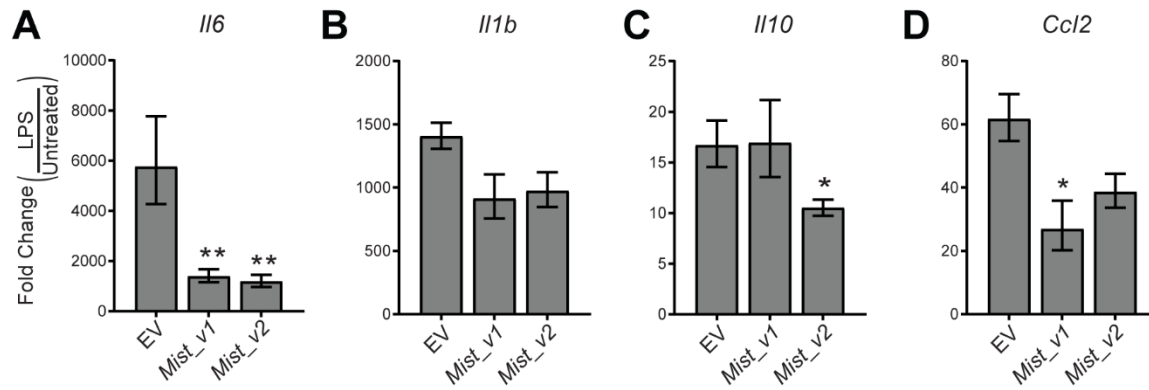

Supplemental Figure VII

(A-D) RT-qPCR of LPS-induced gene expression, fold change relative to untreated cells after transient *Mist* overexpression in RAW cells for 72h. Bars represent mean  $2^{-\Delta\Delta Ct}$  values, error bars represent SEM. n=3. \*p<0.05, \*\*p<0.01

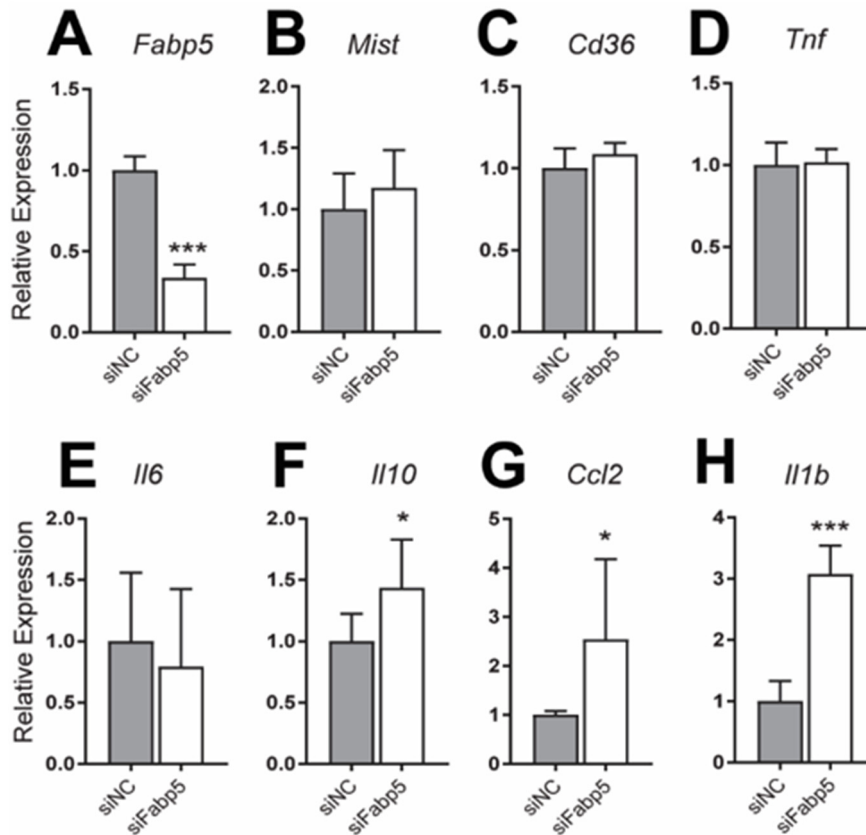

Supplemental Figure VIII

Effects of siRNA-mediated silencing of *Fabp5*. (A) – (H): RT-qPCR of indicated genes after transfection with ON-TARGETplus *Fabp5*-siRNA pool (siFabp5) or non-targeting control (siNC) siRNA (both manufactured by Dharmacon); n=6 except for *Il6* and *Tnf* (n=3). Bar graphs represent mean values, error bars = SEM. \*p<0.05, \*\*\*p<0.001

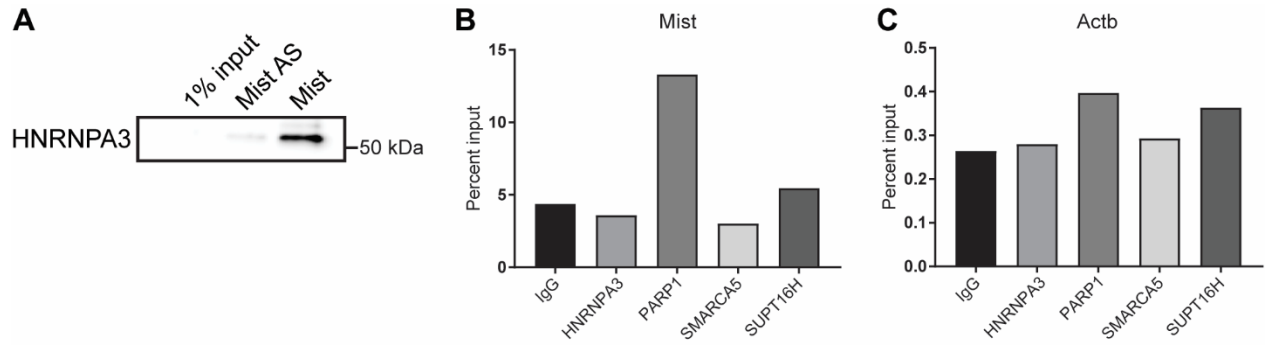

Supplemental Figure IX

(A) RNA-pulldown followed by Western blot using HNRNPA3 antibody. RNA-protein complexes were run on SDS-PAGE gel and probed using HNRNPA3 antibody. (B) Native RNA Immunoprecipitation (RIP) of candidate *Mist*-interacting candidate proteins. HNRNPA3, PARP1, SMARCA5 and SUPT16H were immunoprecipitated from RAW nuclear lysates, and *Mist* (B) and *ActB* (C) RNA was measured by qRT-PCR. IgG was used for isotype-control IP.

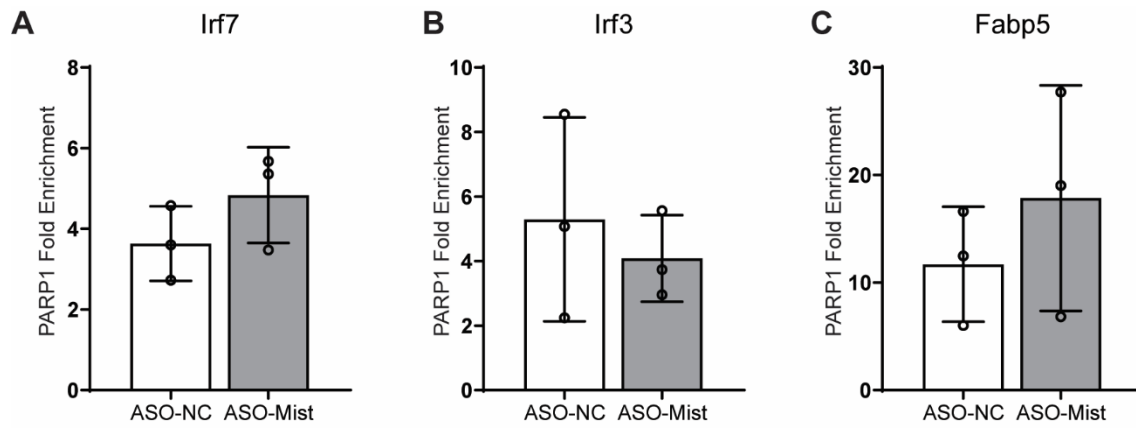

Supplemental Figure X

(A-C) Associated with Figure 5E, ChIP-qPCR for PARP1 enrichment at promoters of indicated genes. ChIP assay was performed using PAR-optimized protocol (see Methods). n=3 per group.

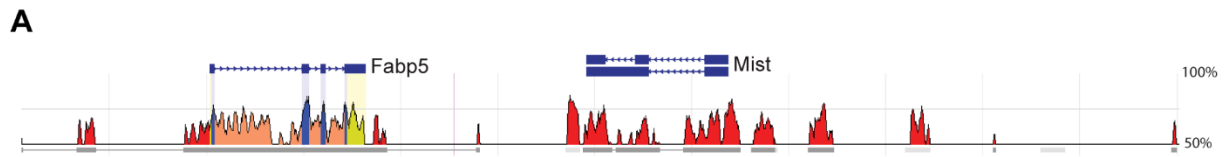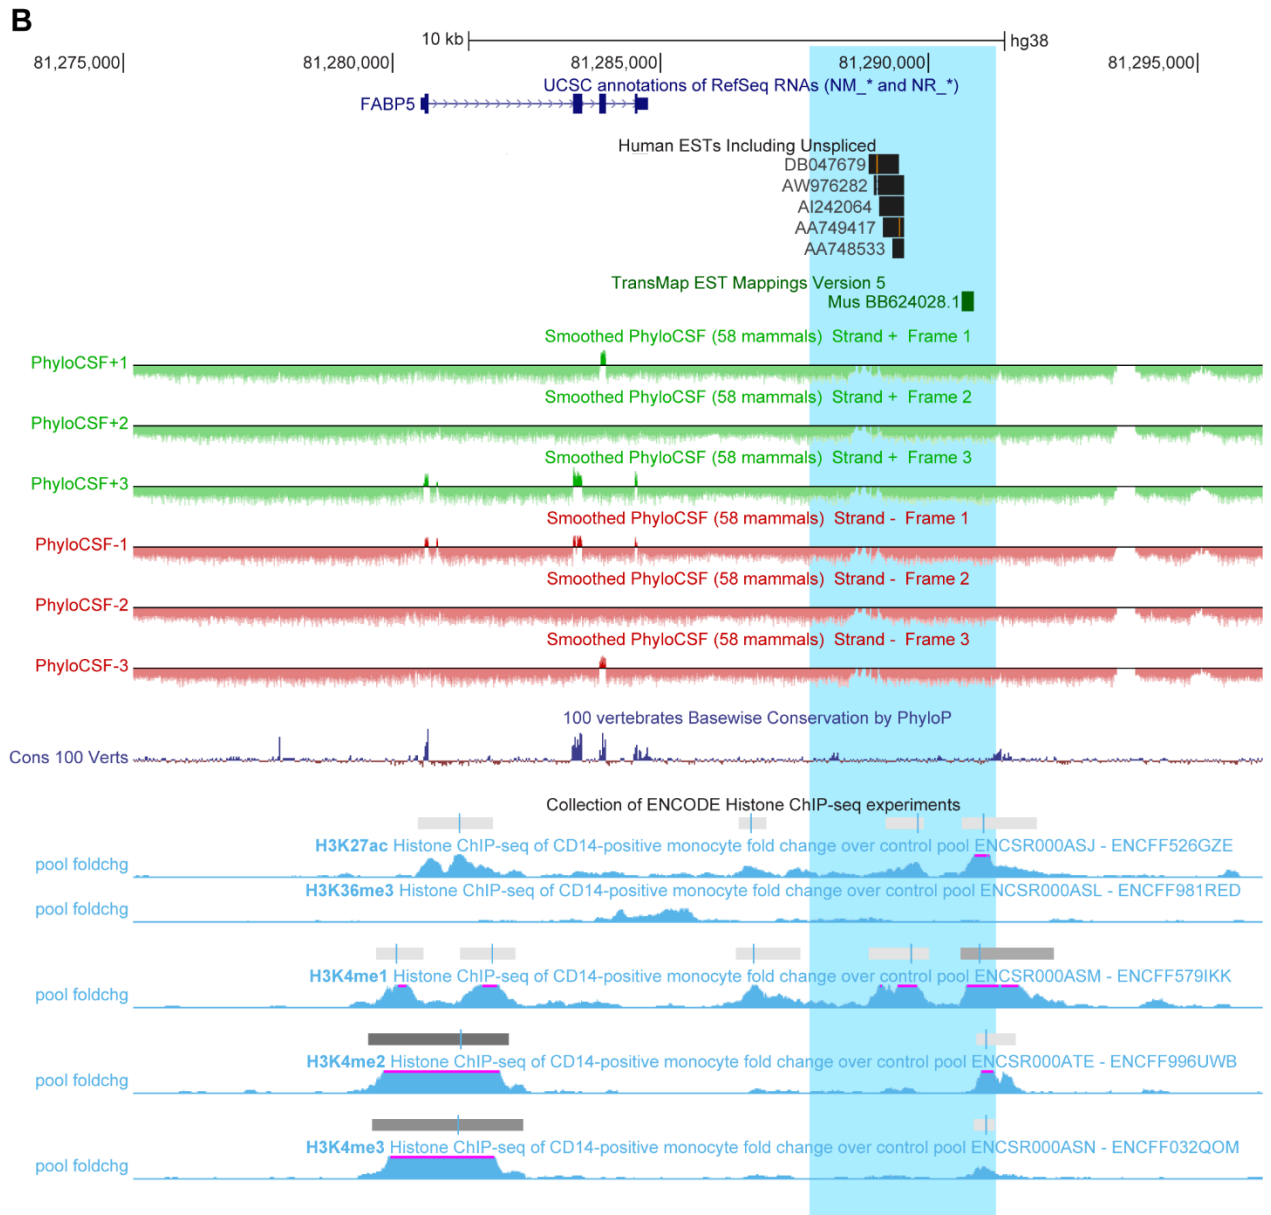

Supplemental Figure XI

Evidence of *Mist* homology in humans. (A) Evolutionarily conserved domains within *Mist* genomic locus between mouse (mm9) and human (hg19) genome assemblies. Peak height represents degree of homology in human genome compared to mouse. X-axis represents mm9 chr3:10005000-10035000. Peak colors indicate relation to protein-coding features within the conservation profile; blue corresponds with coding exons, yellow with UTRs, salmon with intronic sequences and red with intergenic sequences. Tracks were generated with ECR Browser<sup>2</sup>. (B) Snapshot of *Fabp5-Mist* locus from hg38 UCSC Genome Browser. Light blue box represents predicted *Mist* locus, determined using LiftOver tool. ESTs and Human ESTs overlapping *Fabp5* were removed.

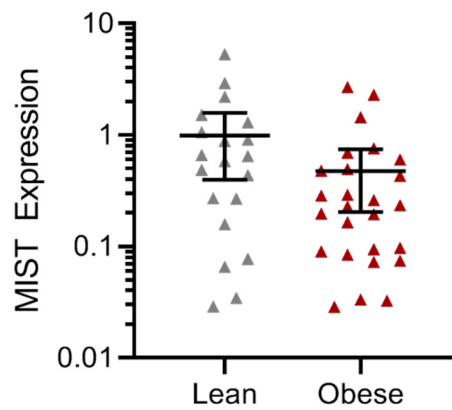

Supplemental Figure XII

*MIST* expression in stromal vascular fraction (SVF) of adipose tissue samples from obese and lean donors. Adipose tissue was collected from obese patients undergoing bariatric surgery and lean donors. Brackets represent mean  $\pm$  95% CI.  $p=0.08$ .



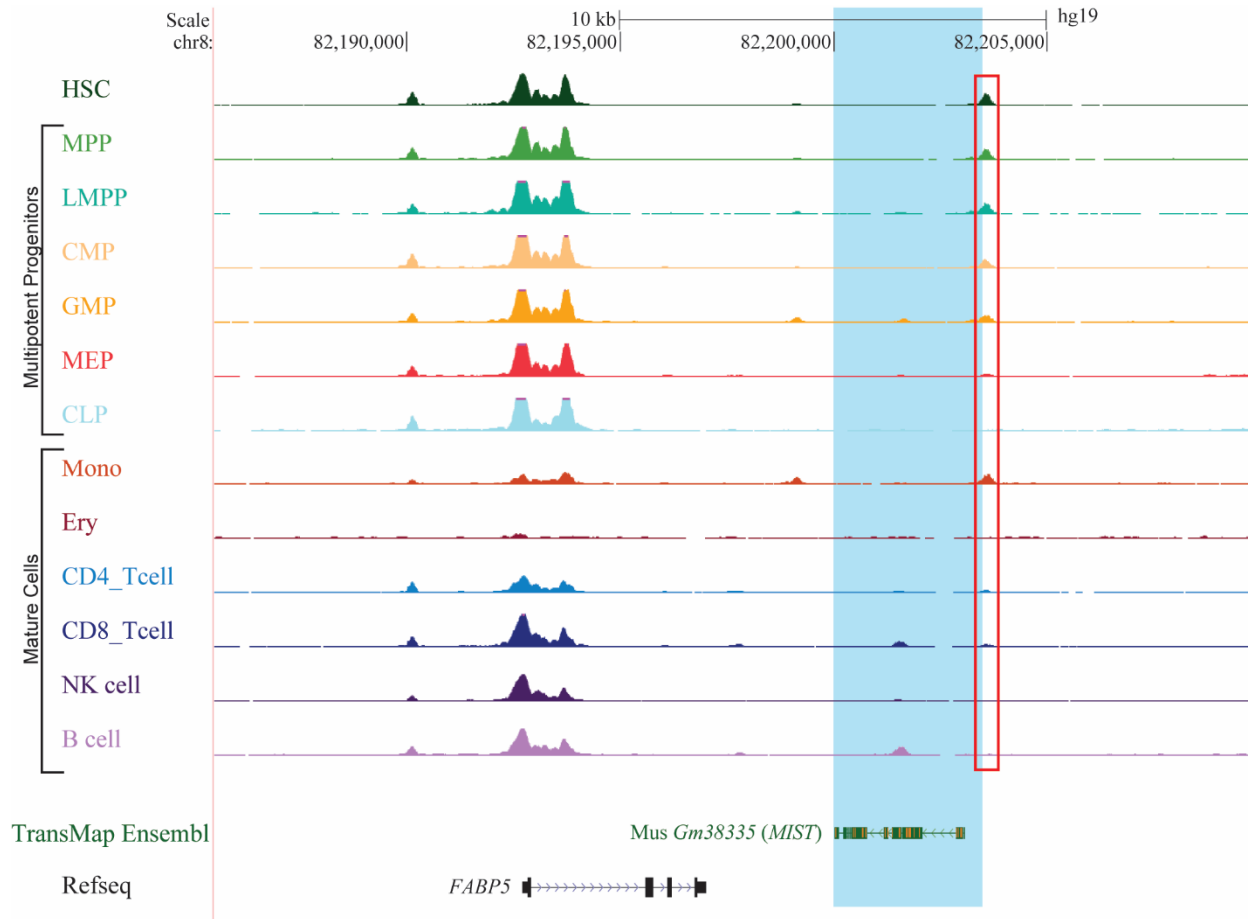

Supplemental Figure XIII

Chromatin accessibility at human *MIST* locus at various stages of hematopoietic differentiation. Normalized ATAC-seq tracks generated from 13 cell populations from various stages of human hematopoietic hierarchy. Tracks and figure were adapted from Corces et al<sup>3</sup>. Blue highlight shows *MIST* locus determined by Lift-over tool in UCSC Genome Browser. Red box indicates putative *MIST* promoter. HSC, hematopoietic stem cells; MPP, multipotent progenitor cells; LMPP, lymphoid-primed multipotent progenitor cells; CMP, common myeloid progenitor; GMP, granulocyte-macrophage progenitor cells; MEP, megakaryocyte-erythroid progenitor cells; CLP, common lymphoid progenitors.

**Supplemental Table I** – Clinical characteristics of lean, obese healthy, and obese unhealthy subjects

| Characteristics           | Lean (n=20)      | MHO (n=6)        | MUO (n=20)       |
|---------------------------|------------------|------------------|------------------|
| Female                    | 10/20 (50)       | 5/6 (83)         | 12/20 (60)       |
| BMI (kg/m <sup>2</sup> )  | 26.2 ± 2.0       | 45.9 ± 4.8       | 53.4 ± 8.6*      |
| Fasting Glucose (mg/dL)   | 100.3 ± 11.6     | 84.5 ± 18.0      | 93.3 ± 11.3      |
| Fasting Insulin (mIU/mL)  | 7.42 ± 5.18      | 7.05 ± 2.17      | 21.89 ± 21.56†   |
| Total Cholesterol (mg/dL) | 188 ± 35         | 145 ± 43         | 168 ± 52         |
| Triglyceride (mg/dL)      | 116.1 ± 74.2     | 74.3 ± 37.4      | 127.2 ± 76.4     |
| HDL (mg/dL)               | 45.0 ± 9.1       | 38.2 ± 15.5      | 39.0 ± 7.8       |
| LDL (mg/dL)               | 120.3 ± 31.2     | 91.8 ± 38.4      | 106.7 ± 35.0     |
| HbA1c % (mmol/mol))       | 5.09 ± 0.31 (32) | 4.92 ± 0.43 (30) | 5.41 ± 0.56 (36) |
| CRP (mg/dL)               | 4.22 ± 4.50      | 12.14 ± 9.76     | 10.63 ± 8.73     |
| HOMA-IR                   | 1.95 ± 1.33      | 1.45 ± 0.53      | 5.12 ± 5.40†     |
| QUICKI                    | 0.364 ± 0.045    | 0.365 ± 0.020    | 0.314 ± 0.026†   |

Data are mean ± SD, or n (%). MHO, Metabolically healthy obese; MUO, Metabolically unhealthy obese; CRP, C-reactive protein; QUICKI, quantitative insulin-sensitivity check index. MHO cohort was defined as BMI > 40 and the following criteria: Triglyceride < 150 mg/dL, Fasting glucose < 101 mg/dL, Fasting insulin < 10 mIU/mL, and HbA1C < 5.7%. MUO cohort was defined as all obese subjects (BMI > 40) who failed to meet MHO criteria. HOMA-IR was calculated using the following equation: [glucose (mg/dl) x insulin (mIU/L)/405]. QUICKI was calculated using the following equation: [1/(log(insulin(mg/dl)) + log(glucose(mg/dl)))]. \*p < 0.05, †p < 0.001 comparing MHO to MUO subjects.

**Supplemental Table II – Primer and GapmeR sequences used in this study**

| <b>Mouse qPCR primers</b> | <b>Forward</b>           | <b>Reverse</b>             |
|---------------------------|--------------------------|----------------------------|
| <i>Actb</i>               | AGGAGTACGATGAGTCCGGC     | GGTGTAACGCAGCTCAGTA        |
| <i>Fabp5</i>              | TGGCAACAACATCACGGTCA     | GGTGCAGACCGTCTCAGTTT       |
| <i>Mist</i>               | ACAAGGCTACCTCTGTGCT      | GATCTCCAGCAGGCGAAAAC       |
| <i>Ppard</i>              | TCACCAGCAGCCTAAAAGCA     | AGGCCAGGCTTCTTGAAAG        |
| <i>IL18</i>               | TCTTGGCCCAGGAACAATGG     | ACAGTGAAGTCGGCCAAAGT       |
| <i>Srebp1</i>             | CTTTTCCTTAACGTGGGCCT     | TCAAAACCGCTGTGTCCAGT       |
| <i>IL1b</i>               | TGCCACCTTTTGACAGTGATG    | TGATGTGCTGCTGCGAGATT       |
| <i>Ifnf</i>               | TTCAGCAACAGCAAGGCGAA     | ATTGAATGCTTGGCGCTGGA       |
| <i>Cd97</i>               | CCATGAGGGGCGTCAGATG      | GCACAGTTCTTACTCTCTGCCT     |
| <i>Ccl2</i>               | AGGTCCTGTGTCATGCTTCTGG   | CAGCACTTCTTTGGGACACCTGCTG  |
| <i>Cd36</i>               | GATGACGTGGCAAAGAAGACAG   | TCCTCGGGGTCCCTGAGTTAT      |
| <i>Il6</i>                | ACAAAGCCAGAGTCCTTCAGAG   | ACCACAGTGAGGAATGTCCAC      |
| <i>Il10</i>               | TGCTTCTATGCAGTTGATGAAGAT | AGCTCCAAGACCAAGGTGTC       |
| <i>Nos2</i>               | CCTGGAGACCCACACACTGG     | CACAGCCACATTGATCTCCG       |
| <i>Tnf</i>                | TGTTGCCTCCTCTTTTGCTT     | TGGTCACCAAATCAGCGTTA       |
| <i>Arg1</i>               | TGCATATCTGCCAAAGACATCG   | CGTAGAAGTGTTCCCCAGGGTCTACG |
| <i>Cd206</i>              | GTGGAGTGATGGAACCCAG      | CTGTCCGCCAGTATCCATC        |
| <i>Il4</i>                | TCCATTTGCATGATGCTCTT     | AGCTGCACCATGAATGAGTC       |
| <b>Human qPCR Primers</b> |                          |                            |
| <b>Primers</b>            | <b>Forward</b>           | <b>Reverse</b>             |
| <i>ACTB</i>               | ATGATGATATCGCCGCGCTC     | AATCCTTCTGACCCATGCC        |
| <i>FABP5</i>              | ACAATGTACCTGTACTCGGA     | AGAAACAGTATGGAGATTTGCTCA   |
| <i>MIST</i>               | TCACTGCCATTTGATGGGTCA    | AAACCAGTTCACCGGCTTCA       |
| <i>GAPDH</i>              | CATCACTGCCACCCAGAAGACTG  | ATGCCAGTGAGCTTCCCCTTCCAG   |
| <b>ChIP qPCR</b>          |                          |                            |
| <b>Forward</b>            | <b>Reverse</b>           |                            |
| Tnf_pro                   | CCCAAGGGCTATAAAGGCGG     | CTGGCTAGTCCCTTGCTGTC       |
| Irf7_pro                  | GTGAAAAGGAGGGTGCCAGT     | ACACCCTAGTGACGTCTGGA       |
| CD36_pro                  | GCTAGGAAACCATCCACCAGT    | GCTCGTTTCAACTCTCACACAC     |
| Irf3_pro                  | AGAAGGCTCGAAGACCGTAG     | AAAGTGGGAAATCGGACCAG       |
| Il6_pro                   | AGTGCTCATGCTTCTTAGGGC    | TGTGACGTCGTTTAGCATCG       |
| Fabp5_pro                 | CAGCTGTCACTAAGGGAGGC     | GGACTGGGACGTCACGTTT        |
| <b>Other primers</b>      |                          |                            |
| <b>Forward</b>            | <b>Reverse</b>           |                            |
| mMist full sequence       | TTGTGGTACACCAACAGTCT     | GGGTGATTGAAACATTGCTC       |
| <b>GapmeRs</b>            |                          |                            |
| Mist GapmeR#4             | TATGACAGACTGCTGG         |                            |

**Supplemental Table III** – HFD-induced differentially expressed novel lncRNAs and nearest neighboring gene

| Gene                           | Log <sub>2</sub> Fold Change (HFD/SD) | Adjusted p-value | Nearest known gene | bp to coding gene | Log <sub>2</sub> Fold Change | Adjusted p-value |
|--------------------------------|---------------------------------------|------------------|--------------------|-------------------|------------------------------|------------------|
| XLOC_008438                    | 0.68                                  | 5.44E-06         | <i>Gm2848</i>      | 8120              | 0.435                        | 0.148            |
| XLOC_002027                    | -0.88                                 | 4.25E-05         | <i>Pde7b</i>       | 0                 | -0.571                       | 0.019            |
| XLOC_007427                    | 0.66                                  | 2.65E-04         | <i>Klf6</i>        | -16021            | 0.119                        | 0.667            |
| XLOC_016982                    | -0.60                                 | 4.99E-03         | <i>Ovol2</i>       | -5331             | -                            | -                |
| XLOC_024799                    | -0.52                                 | 1.05E-02         | <i>Dnah6</i>       | 0                 | -                            | -                |
| XLOC_014071                    | -0.48                                 | 1.14E-02         | <i>Impact</i>      | 3282              | -0.242                       | 0.247            |
| XLOC_019580<br>( <i>Mist</i> ) | -0.61                                 | 1.39E-02         | <i>Fabp5</i>       | -5696             | -0.374                       | 0.018            |
| XLOC_015429                    | -0.55                                 | 1.99E-02         | <i>Npas4</i>       | -218              | -0.232                       | 0.605            |
| XLOC_016459                    | -0.56                                 | 2.24E-02         | <i>Agps</i>        | 48762             | 0.071                        | 0.823            |
| XLOC_003432                    | -0.60                                 | 2.71E-02         | <i>Lta4h</i>       | 181               | -0.163                       | 0.551            |
| XLOC_020244                    | 0.57                                  | 3.12E-02         | <i>Bcar3</i>       | 27785             | 0.202                        | 0.506            |
| XLOC_029811                    | -0.52                                 | 5.53E-02         | <i>Mir21c</i>      | 72401             | -                            | -                |

High fat diet-responsive novel lncRNAs identified in mouse PMs, paired with the most proximal gene and respective change in expression upon HFD. Neighboring genes were identified using “nearest” command from bedtools software. Highlighted row corresponds to *Mist* and *Fabp5*.

**Supplemental Table IV – *Mist* isoform sequences, cloned from RAW264.7 cDNA**

>Mist\_v1

TTGTGGTCACACCAACAGTCTGTCATAAAAAGGAGTCTTTGTTCTTCTGTGGAGCTTCCCAAACCTTCTATGTGA  
ATGTCATTCATGCTACTAGTTTGAAGCTCTGAAATCCATCTCTGGGAATTTCTTTCTTGTATTTTTGTTTTCT  
TTCAGTAATAGTCTAGATAAAAAAGTCAAGAAGCTAAGAAACAGGATATAAAAACAAACAATAACAACAACAAAA  
AAGTGCCAGGGCTTCAGAGACCTTCACACATGGGTACCCACAACCTGGTATGGCCATGCACATGGAAGACGGAG  
AAGAAGGCACTGGCTTTGTGCCTAAGCAAATTCAGGCTTTACGTAATCATCGGTGACAAAGAAAGAAGACCTC  
CACTATAAAAACAGACATCAATTCTTTAACTGTAGAATAAATGATTCCCCGATCCAGATGTTTGATGTGCAAACA  
GGGAAAGATGTGATCCCTGCTAGTAAACTGCCTGCTGGGAAACCATTGTGCAACATAGAAGCTTCCCTAACTA  
GGTGACCAACACATCCATTGTCACAAGGCTACCTCTGTCGCTGCCCTCCATGTGAGCTGCTGTGTGTTGAAAAC  
ACTGGCAGAAGCAGCCTCCCCAGCAAGTTTTCGCCTGCTGGAGATCTGTCTCTGAGACAAATATAGAGGATGGA  
GACGTTTGTGGCTTGTCTGCCATCAAAGACCCAATTGCTTCCTGCGTTGCAGGAAATGAAGTGCAGCCTCTCA  
GCCCCGTCCACCTCCACAAGTGACTGTCAGTGGAGAACAAGCTGAAGCAGTTGGACTTGCTCTGAGTTCCCAGA  
TCTGAGCCAATTCAGGCTCACAATGTCATTAACCACCAGTACTTGGAGGAGAGCTTAAACACTGCTTTGTCC  
AGTTACTTTCAAAGAGAGTTTCTAGGAAGAGCTATTCCAAATATCAGTCTGTCATTTTACCACCGAAGAAAT  
TTTAAAGTGTGCAGTGCAGGAAGAGACAGGAAGAAGAAGGGACTGGATTGAAAGAGAATGGTCCCTTGTGATCT  
GGTGACAGAGCCGGACAGAGCAGATGTCATAAGACTCCAGTTATTTTCCAGCTCTGGTGTGACAGTGGTGTGAC  
CAGCAGCCAGTCATAACCACCTGCCTTTCACAACCTTGAAGAGACACGTCCTCAGCTCTCTAAACCAGTTTGT  
CAGCTTCATCAGTCCAGCACACAAGAGCATCTAAGCAGCAGTCAACAGAGCTGAGAGAAATCAAAAAGGGGAAA  
AAAAACAACAAAAAACTAGGAGAAAGCTGTAATTTCTCCTAAGTCAACAGACAATGCAATAGACGTTCACTG  
ACTTTAAAACAGTAAGCACTGGGGTTTTGAGAAAACAGCTGATGACCTTAAGAATCAAGAAAGCATGTCAGCAA  
TAGACGAAATAGAACCCTGTGTATATGGCATAGAGCAATGTTTCCAATCACCCAAAAA

>Mist\_v2

TTGTGGTCACACCAACAGTCTGTCATAAAAAGGAGTCTTTGTTCTTCTGTGGAGCTTCCCAAACCTTCTATGTGA  
ATGTCATTCATGCTACTAGTTTGAAGCTCTGAAATCCATCTCTGGGAATTTCTTTCTTGTATTTTTGTTTTCT  
TTCAGTAATAGTCTAGATAAAAAAGTCAAGAAGCTAAGAAACAGGATATAAAAACAAACAATAACAACAACAAAA  
AAGTGCCAGGGCTTCAGAGACCTTCACACATGGGTACCCACAACCTGGTATGGCCATGCACATGGAAGACGGAG  
AAGAAGGCACTGGCTTTGTGCCTAAGCAAATTCAGGCTTTACGTAATCATCGGTGACAAAGAAAGAAGACCTC  
CACTATAAAAACAGACATCAATTCTTTAACTGTAGAATAAATGATTCCCCGATCCAGATGTTTGATGTGCAAACA  
GGGAAAGATGTGATCCCTGCTAGTAAACTGCCTGCTGGGAAACCATTGTGCAACATAGAAGCTTCCCTAACTA  
GGTGACCAACACATCCATTGTCACAAGGCTACCTCTGTCGCTGCCCTCCATGTGAGCTGCTGTGTGTTGAAAAC  
ACTGGCAGAAGCAGCCTCCCCAGCAAGTTTTCGCCTGCTGGAGATCTGTCTCTGAGACAAATATAGAGGATGGA  
GACGTTTGTGGCTTGTCTGCCATCAAAGACCCAATTGCTTCCTGCGTTGCAGGAAATGAAGTGCAGCCTCTCA  
GCCCCGTCCACCTCCACAAGTGACTGTCAGTGGAGAACAAGCTGAAGCAGTTGGACTTGCTCTGAGTTCCCAGA  
TCTGAGCCAATTCAGGCTCACAATGTCATTAACCACCAGTACTTGGAGGAGAGCTTAAACACTGCTTTGTCC  
AGTTACTTTCAAAGAGAGTTTCTAGGAAGAGCTATTCCAAATATCAGTCTGTCATTTTACCACCGAAGGTA  
ATCGGGGtttgttttgttttgttttgttttgttttgttttgttttGAAACAGGCACCTCTCACTTCCCTAGC  
TGATACCTTGGTGGTGTGAGTACCTTCCAGATTCATCCACGTTTCTCCTGAACAAGTACAGAGCCACGTGCTG  
TGCTCCCTGCTCAAGTCTTAGACAGTTTGCCTTGCATTGCTTTCTTTTTTCCCCATTGATTAATTTATTTAC  
TACTTTACATCTGGATGAATCATATcctcccttctctctctctctccagtccttccctttcccttgccccag  
cccctccctccacacctcctccAAGCTTATCATCTGTGGCTCCCTGTCCCCATCTGGGGCTCCTGCCCTGCCCC  
TCTTGTCACTTACAATACACTAGACTCAGATATTTGcctgactaccctgttcatcactcagagctgggtcaaa  
tatgacctttgagagagccttccctaccatctcatcgtgtagtttccctccctatgcctcTGGGTCAATCACAT  
GGTTTGGGTTTGGCTTGTCCCAGCTGTGTGCATCCCTCTAGGCTGAGCCTTTGACCTGTGTATGTTCTATCTCC  
TCACTCTAGTGTGAGTCCAGGAGAAAGACCCTGCCCCATCCTGCCCTGCTTCTGGGCTGCTTTAAATTGCTC  
TTTGTGTTATACACTGCTGTGACTTAAAAAAAAAAATCATTTCCAAAGACACTTCTGTTTCCCAGAAATTTT  
TAAAGTGTGCAGTGCAGGAAGAGACAGGAAGAAGAAGGGACTGGATTGAAAGAGAATGGTCCCTTGTGATCTGG  
TGACAGAGCCGGACAGAGCAGATGTCATAAGACTCCAGTTATTTTCCAGCTCTGGTGTGACAGTGGTGTGACCA  
GCAGCCAGTCATAACCACCTGCCTTTCACAACCTTGAAGAGACACGTCCTCAGCTCTCTAAACCAGTTTGTCA  
GCTTCATCAGTCCAGCACACAAGAGCATCTAAGCAGCAGTCAACAGAGCTGAGAGAAATCAAAAAGGGGAAAA  
AAACAACAAAAAACTAGGAGAAAGCTGTAATTTCTCCTAAGTCAACAGACAATGCAATAGACGTTCACTGAC  
TTTAAAACAGTAAGCACTGGGGTTTTGAGAAAACAGCTGATGACCTTAAGAATCAAGAAAGCATGTCAGCAATA  
GACGAAATAGAACCCTGTGTATATGGCATAGAGCAATGTTTCCAATCACCCAAAAA

**Supplemental Table V** – Complete List of Mass Spectrometry results for RNA Pulldown

| Identified Proteins                                                                                        | Accession Number | Number of Peptides |      |
|------------------------------------------------------------------------------------------------------------|------------------|--------------------|------|
|                                                                                                            |                  | Mist AS            | Mist |
| poly [ADP-ribose] polymerase 1 (PARP1)                                                                     | NP_031441.2      | 3                  | 60   |
| PREDICTED: heterogeneous nuclear ribonucleoprotein L isoform X2                                            | gij568944892     | 4                  | 62   |
| ATP synthase subunit beta, mitochondrial precursor                                                         | NP_058054.2      | 2                  | 27   |
| nucleolar RNA helicase 2                                                                                   | NP_062426.2      | 3                  | 39   |
| PREDICTED: heterogeneous nuclear ribonucleoproteins A2/B1 isoform X1                                       | gij755517050     | 4                  | 46   |
| polyadenylate-binding protein 1                                                                            | NP_032800.2      | 2                  | 20   |
| ATP synthase subunit alpha, mitochondrial precursor                                                        | NP_031531.1      | 3                  | 28   |
| heterogeneous nuclear ribonucleoprotein A3 isoform a (HNRNPA3)                                             | NP_932758.1      | 5                  | 44   |
| heterogeneous nuclear ribonucleoprotein A1 isoform b                                                       | NP_001034218.1   | 4                  | 35   |
| myosin-9 isoform 1                                                                                         | NP_071855.2      | 2                  | 16   |
| nucleophosmin isoform 1                                                                                    | NP_032748.1      | 4                  | 32   |
| myb-binding protein 1A                                                                                     | NP_058056.2      | 5                  | 31   |
| 60S ribosomal protein L7a                                                                                  | NP_038749.1      | 2                  | 12   |
| nucleolin                                                                                                  | NP_035010.3      | 12                 | 63   |
| 60S ribosomal protein L4                                                                                   | NP_077174.1      | 8                  | 40   |
| N-acetyltransferase 10                                                                                     | NP_694766.1      | 2                  | 10   |
| 40S ribosomal protein S3a                                                                                  | NP_058655.3      | 4                  | 19   |
| PREDICTED: rRNA 2'-O-methyltransferase fibrillar                                                           | gij568889938     | 3                  | 14   |
| 78 kDa glucose-regulated protein precursor                                                                 | NP_001156906.1   | 6                  | 26   |
| lipoamide acyltransferase component of branched-chain alpha-keto acid dehydrogenase complex, mitochondrial | NP_034152.2      | 3                  | 13   |
| 60S ribosomal protein L7                                                                                   | NP_035421.2      | 4                  | 17   |
| PREDICTED: 40S ribosomal protein S6                                                                        | gij755501126     | 3                  | 12   |
| aldehyde dehydrogenase, mitochondrial precursor                                                            | NP_033786.1      | 3                  | 12   |
| 40S ribosomal protein S8                                                                                   | NP_033124.1      | 5                  | 19   |
| probable ATP-dependent RNA helicase DDX17 isoform 1                                                        | NP_951062.1      | 4                  | 15   |
| heterogeneous nuclear ribonucleoprotein U-like protein 2                                                   | NP_001074665.1   | 12                 | 42   |
| RNA-binding protein 14                                                                                     | NP_063922.2      | 8                  | 28   |
| heterochromatin protein 1-binding protein 3 isoform 1                                                      | gij550821838     | 2                  | 7    |
| serine/arginine-rich splicing factor 7 isoform 1                                                           | NP_666195.1      | 2                  | 7    |
| 60S ribosomal protein L10a                                                                                 | NP_035417.2      | 2                  | 7    |
| probable ATP-dependent RNA helicase DHX37                                                                  | NP_976064.1      | 2                  | 7    |
| PREDICTED: RNA binding motif protein, X-linked-like-1 isoform X1                                           | gij568956346     | 7                  | 24   |
| plectin isoform 12alpha                                                                                    | NP_001157012.1   | 86                 | 287  |
| PREDICTED: acetyl-CoA carboxylase 1 isoform X3                                                             | gij568971082     | 3                  | 10   |
| heterogeneous nuclear ribonucleoprotein U                                                                  | NP_058085.2      | 29                 | 96   |
| guanine nucleotide-binding protein-like 3 long isoform                                                     | NP_705775.2      | 5                  | 16   |
| PREDICTED: probable ATP-dependent RNA helicase DDX5 isoform X1                                             | gij568971472     | 4                  | 12   |
| PREDICTED: unconventional myosin-Ig isoform X1                                                             | gij568970251     | 2                  | 6    |

|                                                               |                |    |     |
|---------------------------------------------------------------|----------------|----|-----|
| 60S ribosomal protein L10                                     | NP_443067.1    | 5  | 14  |
| nucleolar protein 56                                          | NP_077155.2    | 3  | 8   |
| histone H1.4                                                  | NP_056602.1    | 7  | 18  |
| heat shock cognate 71 kDa protein                             | NP_112442.2    | 14 | 35  |
| heat shock protein 75 kDa, mitochondrial precursor            | NP_080784.1    | 2  | 5   |
| splicing factor, proline- and glutamine-rich                  | NP_076092.1    | 13 | 32  |
| stress-70 protein, mitochondrial                              | NP_034611.2    | 6  | 14  |
| heterogeneous nuclear ribonucleoprotein Q isoform 1           | NP_062640.2    | 16 | 37  |
| 40S ribosomal protein S3                                      | NP_036182.1    | 8  | 18  |
| DNA-binding protein A long isoform                            | NP_620817.2    | 8  | 18  |
| prohibitin-2                                                  | NP_031557.2    | 4  | 9   |
| keratin, type I cytoskeletal 14                               | NP_058654.1    | 26 | 58  |
| 40S ribosomal protein S4, X isoform                           | NP_033120.1    | 9  | 20  |
| PREDICTED: 40S ribosomal protein S2 isoform X1                | gij568999163   | 10 | 22  |
| propionyl-CoA carboxylase beta chain, mitochondrial precursor | NP_080111.1    | 7  | 15  |
| 60S ribosomal protein L3                                      | NP_038790.2    | 8  | 17  |
| heterogeneous nuclear ribonucleoprotein A/B isoform 1         | NP_001041526.1 | 9  | 18  |
| constitutive coactivator of PPAR-gamma-like protein 1         | NP_001028440.2 | 6  | 12  |
| superkiller viralicidic activity 2-like 2                     | NP_082427.1    | 2  | 4   |
| PREDICTED: vigilin isoform X1                                 | gij568908015   | 2  | 4   |
| RNA-binding protein EWS                                       | NP_031994.2    | 2  | 4   |
| prohibitin                                                    | NP_032857.1    | 2  | 4   |
| heterogeneous nuclear ribonucleoprotein R isoform a           | gij459683864   | 28 | 51  |
| heterogeneous nuclear ribonucleoprotein M isoform b           | NP_001103383.1 | 15 | 27  |
| RNA-binding protein 39                                        | NP_573505.2    | 5  | 9   |
| keratin, type I cytoskeletal 42                               | NP_997648.2    | 29 | 51  |
| splicing factor U2AF 65 kDa subunit isoform 1                 | NP_001192160.1 | 3  | 5   |
| histone H1.2                                                  | NP_056601.1    | 10 | 16  |
| 60S ribosomal protein L13                                     | NP_058018.2    | 13 | 20  |
| Friend of PRMT1 protein                                       | NP_075704.2    | 8  | 12  |
| 40S ribosomal protein S9                                      | NP_084043.1    | 2  | 3   |
| nucleolar GTP-binding protein 1                               | NP_081276.2    | 2  | 3   |
| actin, cytoplasmic 1                                          | NP_031419.1    | 36 | 53  |
| non-POU domain-containing octamer-binding protein             | NP_075633.2    | 26 | 38  |
| keratin, type I cytoskeletal 16                               | NP_032496.1    | 41 | 59  |
| keratin, type II cytoskeletal 6A                              | NP_032502.3    | 74 | 106 |
| splicing factor 3B subunit 1                                  | NP_112456.2    | 5  | 7   |
| 60S ribosomal protein L18                                     | NP_033103.2    | 5  | 7   |
| RNA-binding protein Raly short isoform                        | NP_001132984.1 | 5  | 7   |
| desmoplakin                                                   | NP_076331.2    | 8  | 11  |
| PREDICTED: ATP-dependent RNA helicase A isoform X1            | gij755493774   | 29 | 39  |
| junction plakoglobin                                          | NP_034723.1    | 6  | 8   |
| galectin-3-binding protein precursor                          | NP_035280.1    | 3  | 4   |

|                                                                                                     |                |     |     |
|-----------------------------------------------------------------------------------------------------|----------------|-----|-----|
| pre-mRNA-processing-splicing factor 8                                                               | NP_619600.2    | 17  | 22  |
| keratin, type I cytoskeletal 17                                                                     | NP_034793.1    | 45  | 58  |
| methylcrotonoyl-CoA carboxylase subunit alpha, mitochondrial                                        | NP_076133.3    | 91  | 116 |
| keratin, type II cytoskeletal 5                                                                     | NP_081287.1    | 163 | 206 |
| RecName: Full=Serum albumin; AltName: Full=BSA                                                      | P02769.4       | 12  | 15  |
| 60S ribosomal protein L19 isoform 1                                                                 | NP_033104.2    | 4   | 5   |
| nuclease-sensitive element-binding protein 1                                                        | NP_035862.2    | 39  | 48  |
| propionyl-CoA carboxylase alpha chain, mitochondrial precursor                                      | NP_659093.2    | 16  | 19  |
| 116 kDa U5 small nuclear ribonucleoprotein component isoform b                                      | NP_001103465.1 | 11  | 13  |
| zinc finger RNA-binding protein                                                                     | NP_035897.2    | 19  | 22  |
| ribonuclease inhibitor isoform a                                                                    | NP_001165571.1 | 8   | 9   |
| methylcrotonoyl-CoA carboxylase beta chain, mitochondrial                                           | NP_084302.1    | 10  | 11  |
| prelamin-A/C isoform A                                                                              | NP_001002011.2 | 21  | 23  |
| heterogeneous nuclear ribonucleoproteins C1/C2 isoform 2                                            | NP_001164452.1 | 13  | 13  |
| U5 small nuclear ribonucleoprotein 200 kDa helicase                                                 | NP_796188.2    | 8   | 8   |
| transcriptional repressor p66-beta                                                                  | NP_647465.1    | 2   | 2   |
| interleukin enhancer-binding factor 2                                                               | NP_080650.1    | 39  | 34  |
| RecName: Full=Trypsin; Flags: Precursor                                                             | P00761.1       | 59  | 47  |
| PREDICTED: interleukin enhancer-binding factor 3 isoform X3                                         | gij568958887   | 64  | 49  |
| unconventional myosin-IId                                                                           | NP_796364.2    | 4   | 3   |
| transcription intermediary factor 1-beta                                                            | NP_035718.2    | 4   | 3   |
| matrin-3                                                                                            | NP_034901.2    | 11  | 7   |
| PREDICTED: ELAV-like protein 1 isoform X1                                                           | gij568953118   | 22  | 7   |
| PREDICTED: interferon-inducible double-stranded RNA-dependent protein kinase activator A isoform X1 | gij755499566   | 7   | 2   |
| pyruvate carboxylase, mitochondrial isoform 1                                                       | NP_001156418.1 | 2   | 0   |
| polypyrimidine tract-binding protein 3 isoform 1                                                    | NP_659153.2    | 2   | 0   |
| transcriptional repressor p66 alpha isoform d                                                       | gij557128941   | 2   | 0   |
| DNA topoisomerase 1                                                                                 | NP_033434.2    | 0   | 28  |
| U3 small nucleolar RNA-associated protein 14 homolog A                                              | NP_082552.1    | 0   | 4   |
| PREDICTED: serine/arginine repetitive matrix protein 2 isoform X1                                   | gij569001949   | 0   | 14  |
| PREDICTED: thyroid hormone receptor-associated protein 3 isoform X1                                 | gij755508129   | 0   | 26  |
| PREDICTED: chromodomain-helicase-DNA-binding protein 4 isoform X8                                   | gij568940139   | 0   | 4   |
| dynein heavy chain 9, axonemal                                                                      | NP_001093103.1 | 0   | 2   |
| DNA ligase 3                                                                                        | NP_034846.2    | 0   | 20  |
| 60S ribosomal protein L13a                                                                          | NP_033464.2    | 0   | 5   |
| bcl-2-associated transcription factor 1 isoform 3                                                   | NP_001020564.1 | 0   | 22  |
| serine hydroxymethyltransferase, mitochondrial isoform 2                                            | NP_001239245.1 | 0   | 14  |
| PREDICTED: 60S ribosomal protein L6 isoform X1                                                      | gij568936990   | 0   | 15  |
| serine/arginine-rich splicing factor 1 isoform 1                                                    | NP_775550.2    | 0   | 19  |
| 60S ribosomal protein L8                                                                            | NP_036183.1    | 0   | 8   |
| elongation factor 1-alpha 1                                                                         | NP_034236.2    | 0   | 11  |
| aconitate hydratase, mitochondrial precursor                                                        | NP_542364.1    | 0   | 7   |



|                                                                                 |                    |          |          |
|---------------------------------------------------------------------------------|--------------------|----------|----------|
| glutamate dehydrogenase 1, mitochondrial precursor                              | NP_032159.1        | 0        | 7        |
| ATPase family AAA domain-containing protein 3                                   | NP_849534.2        | 0        | 8        |
| PREDICTED: nucleolar transcription factor 1 isoform X3                          | gij755538064       | 0        | 2        |
| PREDICTED: nuclear mitotic apparatus protein 1 isoform X3                       | gij568949281       | 0        | 2        |
| tubulin alpha-1B chain                                                          | NP_035784.1        | 0        | 11       |
| ADP/ATP translocase 2                                                           | NP_031477.1        | 0        | 6        |
| replication factor C subunit 1                                                  | NP_035388.2        | 0        | 6        |
| 60S acidic ribosomal protein P0                                                 | NP_031501.1        | 0        | 15       |
| nucleolar protein 58                                                            | NP_061356.2        | 0        | 7        |
| histone H1.5                                                                    | NP_064418.1        | 0        | 11       |
| arginine/serine-rich splicing factor 6                                          | NP_080775.3        | 0        | 4        |
| tubulin beta-5 chain                                                            | NP_035785.1        | 0        | 11       |
| transmembrane glycoprotein NMB precursor                                        | NP_444340.3        | 0        | 10       |
| heterogeneous nuclear ribonucleoprotein D0 isoform a                            | NP_001070733.1     | 0        | 7        |
| TATA-binding protein-associated factor 2N                                       | NP_081703.1        | 0        | 4        |
| unconventional myosin-Ic isoform a                                              | NP_001074244.1     | 0        | 3        |
| poly(U)-binding-splicing factor PUF60 isoform c                                 | NP_001158072.1     | 0        | 6        |
| PREDICTED: ATP-dependent RNA helicase DDX3X isoform X1                          | gij569008633       | 0        | 7        |
| RRP12-like protein                                                              | NP_955518.1        | 0        | 3        |
| mitochondrial inner membrane protein isoform 2                                  | NP_001240610.1     | 0        | 6        |
| PREDICTED: aminopeptidase N isoform X1                                          | gij568947434       | 0        | 9        |
| PREDICTED: myeloid cell nuclear differentiation antigen-like protein isoform X6 | gij569020023       | 0        | 6        |
| PREDICTED: RNA-binding protein 47 isoform X2                                    | gij568934233       | 0        | 4        |
| PREDICTED: 60 kDa heat shock protein, mitochondrial isoform X1                  | gij568905803       | 0        | 3        |
| PREDICTED: sphingosine-1-phosphate lyase 1 isoform X1                           | gij568967055       | 0        | 3        |
| trifunctional enzyme subunit alpha, mitochondrial precursor                     | NP_849209.1        | 0        | 7        |
| 60S ribosomal protein L14                                                       | NP_080250.1        | 0        | 8        |
| double-stranded RNA-specific adenosine deaminase isoform 3                      | NP_001139768.1     | 0        | 3        |
| cell division cycle 5-like protein                                              | NP_690023.1        | 0        | 11       |
| PREDICTED: splicing factor 3B subunit 3 isoform X1                              | gij568955816       | 0        | 3        |
| PREDICTED: splicing factor 3B subunit 2 isoform X1                              | gij569005837       | 0        | 4        |
| <b>FACT complex subunit SPT16 (SUPT16)</b>                                      | <b>NP_291096.2</b> | <b>0</b> | <b>2</b> |
| transformer-2 protein homolog beta                                              | NP_033212.1        | 0        | 7        |
| PREDICTED: 60S ribosomal protein L15 isoform X1                                 | gij568985566       | 0        | 8        |
| serine/arginine-rich splicing factor 5                                          | NP_033185.2        | 0        | 8        |
| PREDICTED: H/ACA ribonucleoprotein complex subunit 4 isoform X1                 | gij569010120       | 0        | 4        |
| PREDICTED: DNA repair protein XRCC1 isoform X1                                  | gij568945263       | 0        | 4        |
| PREDICTED: myelin expression factor 2 isoform X2                                | gij568915716       | 0        | 6        |
| scaffold attachment factor B2                                                   | NP_001025150.2     | 0        | 2        |
| PREDICTED: DBIRD complex subunit ZNF326 isoform X1                              | gij568936023       | 0        | 6        |
| DNA topoisomerase 2-beta                                                        | NP_033435.2        | 0        | 2        |
| ribosomal L1 domain-containing protein 1                                        | NP_079822.1        | 0        | 6        |

|                                                                                                                |                        |          |          |
|----------------------------------------------------------------------------------------------------------------|------------------------|----------|----------|
| PREDICTED: annexin A2 isoform X1                                                                               | gij568960713           | 0        | 2        |
| treacle protein isoform 2                                                                                      | NP_035682.1            | 0        | 3        |
| pre-mRNA-processing factor 6                                                                                   | NP_598462.1            | 0        | 3        |
| leucine-rich PPR motif-containing protein, mitochondrial precursor                                             | NP_082509.2            | 0        | 2        |
| PREDICTED: heterogeneous nuclear ribonucleoprotein H2 isoform X1                                               | gij569011433           | 0        | 6        |
| putative pre-mRNA-splicing factor ATP-dependent RNA helicase DHX15 isoform 1                                   | NP_001036085.1         | 0        | 2        |
| lamin-B1                                                                                                       | NP_034851.2            | 0        | 2        |
| U4/U6.U5 tri-snRNP-associated protein 1                                                                        | NP_058578.3            | 0        | 7        |
| fragile X mental retardation syndrome-related protein 2                                                        | NP_035944.2            | 0        | 5        |
| PREDICTED: apoptotic chromatin condensation inducer in the nucleus isoform X5                                  | gij568988264           | 0        | 3        |
| PREDICTED: probable ATP-dependent RNA helicase DDX23 isoform X1                                                | gij568993535           | 0        | 4        |
| heterogeneous nuclear ribonucleoprotein K                                                                      | NP_079555.1            | 0        | 3        |
| actin-related protein 3                                                                                        | NP_076224.1            | 0        | 4        |
| putative oxidoreductase GLYR1 isoform 1                                                                        | NP_001073282.1         | 0        | 7        |
| DNA-directed RNA polymerase I subunit RPA34                                                                    | NP_665821.1            | 0        | 2        |
| RNA-binding protein 25                                                                                         | NP_081625.3            | 0        | 2        |
| lupus La protein homolog                                                                                       | NP_001103615.1         | 0        | 3        |
| PREDICTED: guanine nucleotide-binding protein G(i) subunit alpha-2 isoform X1                                  | gij568962761           | 0        | 2        |
| sentrin-specific protease 3                                                                                    | NP_109627.3            | 0        | 3        |
| putative ribosomal RNA methyltransferase NOP2                                                                  | NP_620086.2            | 0        | 6        |
| PREDICTED: glyceraldehyde-3-phosphate dehydrogenase-like isoform 2                                             | XP_001476757.1         | 0        | 6        |
| metastasis-associated protein MTA2                                                                             | NP_035972.3            | 0        | 3        |
| phenylalanine--tRNA ligase alpha subunit                                                                       | NP_079924.2            | 0        | 2        |
| serine/arginine repetitive matrix protein 1 isoform 2                                                          | NP_001123949.1<br>(+5) | 0        | 5        |
| PREDICTED: rho guanine nucleotide exchange factor 2 isoform X7                                                 | gij568921927           | 0        | 4        |
| serine beta-lactamase-like protein LACTB, mitochondrial precursor                                              | NP_109642.1            | 0        | 2        |
| heterogeneous nuclear ribonucleoprotein F                                                                      | NP_001159902.1         | 0        | 8        |
| <b>SWI/SNF-related matrix-associated actin-dependent regulator of chromatin subfamily A member 5 (SMARCA5)</b> | <b>NP_444354.2</b>     | <b>0</b> | <b>4</b> |
| RecName: Full=Catalase                                                                                         | P04040.3               | 0        | 2        |
| RNA-binding protein 28                                                                                         | NP_598686.2            | 0        | 2        |
| aspartyl/asparaginyl beta-hydroxylase isoform 3                                                                | NP_001171320.1         | 0        | 2        |
| ribosomal RNA processing protein 1 homolog B isoform 1                                                         | NP_082520.2            | 0        | 5        |
| PREDICTED: transcriptional activator protein Pur-alpha isoform X1                                              | gij755560613           | 0        | 4        |
| PREDICTED: fragile X mental retardation syndrome-related protein 1 isoform X4                                  | gij568920780           | 0        | 4        |
| THO complex subunit 4                                                                                          | NP_035698.1            | 0        | 9        |
| monofunctional C1-tetrahydrofolate synthase, mitochondrial precursor                                           | NP_001164257.1         | 0        | 5        |
| T-complex protein 1 subunit alpha                                                                              | NP_038714.2            | 0        | 3        |
| histone deacetylase 1                                                                                          | NP_032254.1            | 0        | 2        |
| succinyl-CoA:3-ketoacid coenzyme A transferase 1, mitochondrial precursor                                      | NP_077150.1            | 0        | 2        |
| elongation factor Tu, mitochondrial isoform 1                                                                  | NP_766333.1            | 0        | 2        |

|                                                                                    |                |   |    |
|------------------------------------------------------------------------------------|----------------|---|----|
| zinc finger protein 512                                                            | NP_766581.2    | 0 | 2  |
| PREDICTED: transformer-2 protein homolog alpha isoform X5                          | gij568940051   | 0 | 3  |
| PREDICTED: cell growth-regulating nucleolar protein isoform X1                     | gij568933825   | 0 | 3  |
| endoplasmic precursor                                                              | NP_035761.1    | 0 | 3  |
| 26S proteasome non-ATPase regulatory subunit 2                                     | NP_598862.1    | 0 | 3  |
| methyl-CpG-binding domain protein 2                                                | NP_034903.2    | 0 | 2  |
| general transcription factor 3C polypeptide 3                                      | NP_001028366.1 | 0 | 3  |
| histone H1.1                                                                       | NP_085112.1    | 0 | 11 |
| heat shock protein HSP 90-beta                                                     | NP_032328.2    | 0 | 4  |
| probable ATP-dependent RNA helicase DDX41                                          | NP_598820.2    | 0 | 2  |
| ATP-dependent RNA helicase DDX1                                                    | NP_598801.1    | 0 | 2  |
| eukaryotic initiation factor 4A-III                                                | NP_619610.1    | 0 | 5  |
| cold shock domain-containing protein E1 isoform 1                                  | NP_659150.1    | 0 | 2  |
| protein MAK16 homolog                                                              | NP_080729.1    | 0 | 3  |
| glioma tumor suppressor candidate region gene 2                                    | NP_598592.2    | 0 | 2  |
| eukaryotic translation initiation factor 2 subunit 2                               | NP_080306.1    | 0 | 2  |
| PREDICTED: U1 small nuclear ribonucleoprotein 70 kDa isoform X1                    | gij568947548   | 0 | 2  |
| methyl-CpG-binding protein 2 isoform 1                                             | NP_001075448.1 | 0 | 2  |
| tRNA-splicing ligase RtcB homolog                                                  | NP_663397.1    | 0 | 2  |
| protein KRI1 homolog                                                               | NP_663391.2    | 0 | 3  |
| ATP-dependent RNA helicase DDX24 isoform 1                                         | NP_001152974.1 | 0 | 2  |
| phosphoenolpyruvate carboxykinase [GTP], mitochondrial                             | NP_083270.1    | 0 | 2  |
| ubiquitin-associated protein 2-like isoform 4                                      | NP_001159456.1 | 0 | 2  |
| transcriptional activator protein Pur-beta                                         | NP_035351.1    | 0 | 3  |
| processing of precursor 1 isoform 2                                                | NP_080616.1    | 0 | 2  |
| staphylococcal nuclease domain-containing protein 1                                | NP_062750.2    | 0 | 3  |
| MKI67 FHA domain-interacting nucleolar phosphoprotein                              | NP_080748.3    | 0 | 3  |
| KH domain-containing, RNA-binding, signal transduction-associated protein 1        | NP_035447.3    | 0 | 4  |
| heterogeneous nuclear ribonucleoprotein A0                                         | NP_084148.1    | 0 | 4  |
| PREDICTED: serine/threonine-protein kinase PRP4 homolog isoform X1                 | gij568981636   | 0 | 2  |
| polyadenylate-binding protein 2                                                    | NP_062275.1    | 0 | 5  |
| putative RNA-binding protein Luc7-like 2 isoform 2                                 | NP_001164319.1 | 0 | 3  |
| glutaminase kidney isoform, mitochondrial isoform 1                                | NP_001074550.1 | 0 | 2  |
| PREDICTED: RNA-binding protein 6 isoform X1                                        | gij568962788   | 0 | 3  |
| succinate dehydrogenase [ubiquinone] flavoprotein subunit, mitochondrial precursor | NP_075770.1    | 0 | 2  |
| citrate synthase, mitochondrial precursor                                          | NP_080720.1    | 0 | 2  |
| zinc transporter SLC39A7 precursor                                                 | NP_032228.2    | 0 | 2  |
| PREDICTED: testis-expressed sequence 10 protein isoform X1                         | gij568926766   | 0 | 4  |
| pre-mRNA 3'-end-processing factor FIP1 isoform 1                                   | NP_001153045.1 | 0 | 3  |
| 26S protease regulatory subunit 6B                                                 | NP_036004.2    | 0 | 2  |
| guanine nucleotide-binding protein-like 3-like protein                             | NP_932778.1    | 0 | 2  |
| U2 snRNP-associated SURP motif-containing protein isoform 1                        | NP_001108449.1 | 0 | 2  |

|                                                                             |                     |   |   |
|-----------------------------------------------------------------------------|---------------------|---|---|
| PREDICTED: C->U-editing enzyme APOBEC-1 isoform X1                          | gij568940380        | 0 | 2 |
| PREDICTED: histone lysine demethylase PHF8 isoform X1                       | gij569012048        | 0 | 2 |
| PREDICTED: bifunctional polynucleotide phosphatase/kinase isoform X3        | gij568948192        | 0 | 2 |
| regulator of chromosome condensation isoform 1                              | NP_001184011.1      | 0 | 3 |
| electron transfer flavoprotein subunit alpha, mitochondrial                 | NP_663590.3         | 0 | 6 |
| U3 small nucleolar RNA-associated protein 18 homolog                        | NP_001013393.1      | 0 | 2 |
| sequestosome-1                                                              | NP_035148.1         | 0 | 2 |
| succinyl-CoA ligase [GDP-forming] subunit beta, mitochondrial precursor     | NP_035637.2         | 0 | 2 |
| suppressor of SWI4 1 homolog                                                | NP_663585.2         | 0 | 3 |
| pyruvate dehydrogenase E1 component subunit beta, mitochondrial precursor   | NP_077183.1         | 0 | 3 |
| PREDICTED: SAFB-like transcription modulator isoform X4                     | gij568961866        | 0 | 2 |
| interferon-induced, double-stranded RNA-activated protein kinase            | NP_035293.1         | 0 | 2 |
| calcium/calmodulin-dependent protein kinase type II subunit delta isoform 2 | NP_001020609.1      | 0 | 2 |
| RNA-binding protein 7                                                       | NP_659197.2         | 0 | 2 |
| small nuclear ribonucleoprotein-associated protein B                        | NP_033251.1         | 0 | 2 |
| 14-3-3 protein zeta/delta isoform 1                                         | NP_001240734.1      | 0 | 2 |
| 26S protease regulatory subunit 8                                           | NP_032976.1         | 0 | 2 |
| eukaryotic translation initiation factor 2 subunit 3, X-linked              | NP_036140.1         | 0 | 2 |
| lamina-associated polypeptide 2 isoform alpha                               | NP_035735.2         | 0 | 2 |
| electron transfer flavoprotein subunit beta                                 | NP_080971.2         | 0 | 3 |
| 3-hydroxyacyl-CoA dehydrogenase type-2                                      | NP_058043.3         | 0 | 5 |
| isocitrate dehydrogenase [NADP], mitochondrial precursor                    | NP_766599.2         | 0 | 3 |
| PREDICTED: alpha-enolase isoform X1                                         | gij755509256        | 0 | 3 |
| 40S ribosomal protein SA                                                    | NP_035159.3         | 0 | 2 |
| PREDICTED: LOW QUALITY PROTEIN: igE-binding protein-like, partial           | gij755566924        | 0 | 2 |
| PREDICTED: 2'-5'-oligoadenylate synthase-like protein 1 isoform X1          | gij568937127        | 0 | 2 |
| trifunctional enzyme subunit beta, mitochondrial precursor                  | gij577019542        | 0 | 2 |
| DNA-directed RNA polymerase I subunit RPA2                                  | NP_033112.2         | 0 | 2 |
| core histone macro-H2A.1 isoform 2                                          | NP_001152985.1      | 0 | 4 |
| UPF0568 protein C14orf166 homolog                                           | (+5)<br>NP_080804.1 | 0 | 2 |
| caprin-1 isoform b                                                          | NP_001104760.1      | 0 | 2 |
| protein TSSC4 isoform 1                                                     | NP_064681.1         | 0 | 2 |
| Beta-casein                                                                 | P02666.2            | 0 | 2 |
| dnaJ homolog subfamily A member 2                                           | NP_062768.1         | 0 | 2 |
| estradiol 17-beta-dehydrogenase 12                                          | NP_062631.1         | 0 | 2 |
| something about silencing protein 10                                        | NP_075541.1         | 0 | 2 |
| F-actin-capping protein subunit beta isoform c                              | NP_001258334.1      | 0 | 2 |
| DNA-directed RNA polymerase I subunit RPA49 isoform a                       | gij551411429        | 0 | 2 |
| DNA-directed RNA polymerases I and III subunit RPAC1                        | NP_033111.2         | 0 | 2 |
| DNA-directed RNA polymerases I, II, and III subunit RPABC1                  | NP_079830.2         | 0 | 2 |
| raftlin                                                                     | NP_852062.1         | 0 | 2 |
| centromere protein V                                                        | NP_082724.1         | 0 | 2 |

|                                               |
|-----------------------------------------------|
| elongation factor Ts, mitochondrial precursor |
|-----------------------------------------------|

|             |
|-------------|
| NP_079813.1 |
|-------------|

|   |
|---|
| 0 |
|---|

|   |
|---|
| 2 |
|---|

Complete list of proteins identified by mass spectrometry following RNA pulldown with Mist or Mist-AS probes. Top candidate protein partners for Mist which were screened in follow-up validation experiments are highlighted in yellow. Proteins were identified using peptide thresholds of 90.0% minimum, and protein thresholds of 99.0% minimum and 2 peptides minimum.

## References

1. Wang P, Xu J, Wang Y, Cao X. An interferon-independent lncRNA promotes viral replication by modulating cellular metabolism. *Science*. 2017;358(6366):1051–1055.
2. Ovcharenko I, Nobrega MA, Loots GG, Stubbs L. ECR Browser: A tool for visualizing and accessing data from comparisons of multiple vertebrate genomes. *Nucleic Acids Res*. 2004;32(WEB SERVER ISS.):280–286.
3. Corces MR, Buenrostro JD, Wu B, Greenside PG, Chan SM, Koenig JL, Snyder MP, Pritchard JK, Kundaje A, Greenleaf WJ, Majeti R, Chang HY. Lineage-specific and single-cell chromatin accessibility charts human hematopoiesis and leukemia evolution. *Nat. Genet*. 2016;48:1193.

## Major Resources Tables

### Animals (in vivo studies)

| Species      | Vendor or Source       | Background Strain | Sex  |
|--------------|------------------------|-------------------|------|
| Mus musculus | The Jackson Laboratory | C57BL/6J          | Male |

### Antibodies

| Target antigen | Vendor or Source | Catalog #   | Working concentration                    | Lot # (preferred but not required) |
|----------------|------------------|-------------|------------------------------------------|------------------------------------|
| H3K4me3        | Millipore        | 17-614      | 3 $\mu$ L/ChIP                           |                                    |
| PAR            | Trevigen         | 4335-MC-100 | ChIP: 1 $\mu$ g/ul                       | 39816F17                           |
| PARP1          | GeneTex          | GTX112864   | Native RIP: 1:1500<br>ChIP: 1 $\mu$ g/ul | 41031                              |
| PARP1          | Abcam            | ab227244    | Western: 1:2000<br>Crosslink RIP: 1:250  | GR3226439-13                       |
| HNRNPA3        | Proteintech      | 25142-1-AP  | Western: 1:2000<br>Native RIP: 1:1000    |                                    |
| SUPT16H        | Proteintech      | 20551-1-AP  | Native RIP: 1:500                        |                                    |
| SMARCA5        | Proteintech      | 13066-1-AP  | Native RIP: 1:500                        |                                    |

### Cultured Cells

| Name      | Vendor or Source   | Sex (F, M, or unknown) |
|-----------|--------------------|------------------------|
| RAW 264.7 | ATCC, Lot#70000171 | Male                   |
| THP-1     | ATCC               | Male                   |
